# Supplementary material
Source: MDPI journal article supplement (https://www.mdpi.com/2073-4395/12/4/976)
Supplement: s1 [file s1]

**Table S1**

Overview of family structure [Ind. g<sup>-1</sup> DW  $\pm$  s.d.] in grassland and agroforest soil. The replicate containing the most individuals sampled at day 28 was used for family identification. *c – p* values according to Bongers and Bongers [32].

| <b>Family</b>                   | <b><i>c – p</i></b> | <b>Grassland</b> | <b>Agroforest</b> |
|---------------------------------|---------------------|------------------|-------------------|
| <b>Plant feeders</b>            |                     |                  |                   |
| Hoplolaimidae                   | 3                   | 1.5              | -                 |
| Pratylenchidae                  | 3                   | 2.7              | 2.3               |
| Tylenchidae                     | 2                   | 14.5             | 9.4               |
| <b>Fungal feeders</b>           |                     |                  |                   |
| Aphelenchidae                   | 2                   | 0.8              | 0.7               |
| Aphelenchoididae                | 2                   | 9.4              | 8.2               |
| Diphterophoridae                | 3                   | 0.8              | 0.2               |
| <b>Bacterial feeders</b>        |                     |                  |                   |
| Cephalobidae                    | 2                   | 4.2              | 0.2               |
| Monhysteridae                   | 2                   | 3.4              | -                 |
| Plectidae                       | 2                   | 0.4              | 0.2               |
| Prismatolaimidae                | 3                   | -                | 0.7               |
| Rhabditidae                     | 1                   | 0.8              | 0.5               |
| <b>Omnivores</b>                |                     |                  |                   |
| Qudsianematidae                 | 4                   | 1.5              | 0.2               |
| <b>Predators</b>                |                     |                  |                   |
| Tripylidae                      | 3                   | 0.8              | 0.7               |
| <b>Total number of families</b> |                     | 12               | 11                |
