# Supplementary material
Source: MDPI journal article supplement (https://www.mdpi.com/2073-4395/12/4/976)

**a**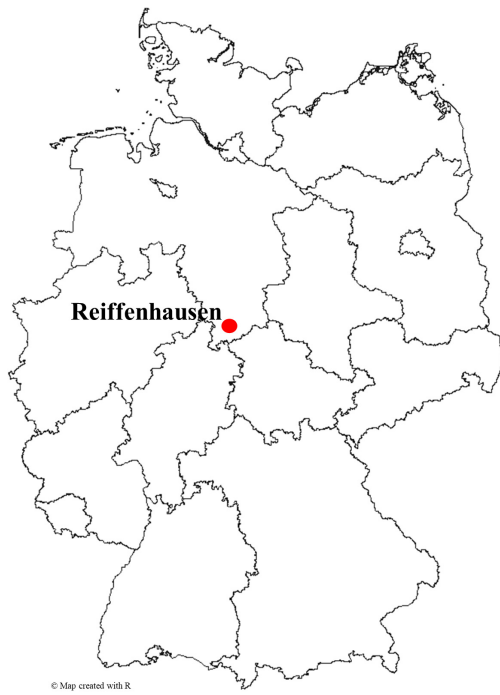**b**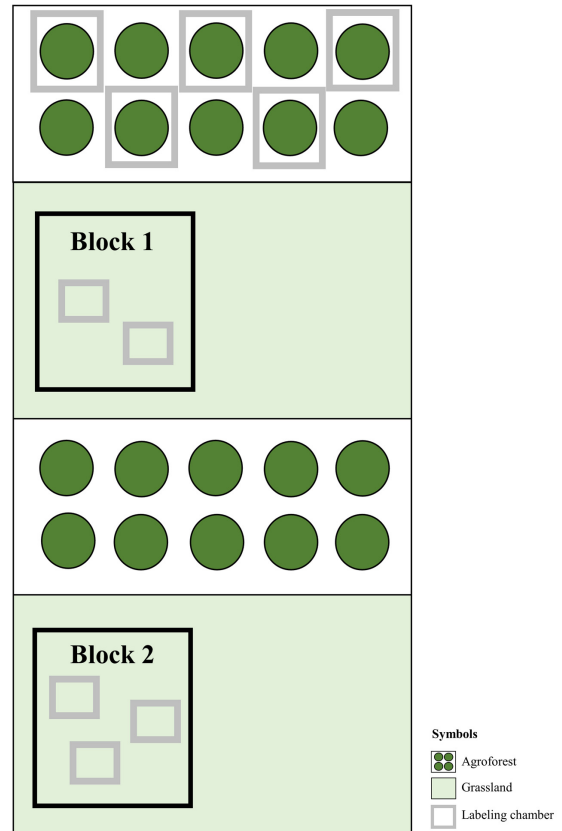

**Figure S1.** (a) Location of study site in Central Germany, (b) scheme of experimental set up.

Supplement: s1 [file s1]
